# Supplementary material for: Hydrogen-intercalation-induced lattice expansion of mesoporous PtPd nanocrystals for enhanced hydrogen evolution
Source: Royal Society of Chemistry journal article supplement (doi:10.1039/d2se01269c), 2022-12-19
Supplement: d2se01269c1.pdf [file d2se01269c1.pdf]

Electronic Supplementary Information for

**Hydrogen-intercalation-induced lattice expansion of mesoporous PtPd  
nanocrystals for enhanced alkaline hydrogen evolution**

Ziqiang Wang, Yanhao Mao, Hugang Zhang, Kai Deng, Hongjie Yu, Xin Wang, You Xu,

Hongjing Wang\* and Liang Wang\*

State Key Laboratory Breeding Base of Green-Chemical Synthesis Technology, College of Chemical Engineering,

Zhejiang University of Technology, Hangzhou, 310014, P. R. China.

E-mails: [hjw@zjut.edu.cn](mailto:hjw@zjut.edu.cn); [wangliang@zjut.edu.cn](mailto:wangliang@zjut.edu.cn)

## Experimental Section

**Chemicals and Materials:** Ascorbic acid (AA) and HCl were purchased from Aladdin (Shanghai, P.R. China). Pluronic F127 (PEO<sub>100</sub>PPO<sub>65</sub>PEO<sub>100</sub>), H<sub>2</sub>PtCl<sub>6</sub>·6H<sub>2</sub>O and Na<sub>2</sub>PdCl<sub>4</sub> were obtained from Sigma-Aldrich. Commercial Pt/C catalyst (20 wt%) was ordered from Alfa Aesar.

**Synthesis of PtPd MNCs:** Typically, 0.02 M of H<sub>2</sub>PtCl<sub>6</sub> (2.4 mL), 0.02 M of Na<sub>2</sub>PdCl<sub>4</sub> (0.8 mL), 6 M of HCl (50  $\mu$ L), and Pluronic F127 (40 mg) were mixed together in a vial to form a homogeneous solution under sonication. Then 0.1 M of AA (4 mL) was added to the above solution, which was kept at 40 °C in a water bath for 4 h with constant sonication. The product was collected by centrifugation and wash with water for several cycles.

**Synthesis of PtPdH MNCs:** The pre-prepared PtPd MNCs (2mg) was dispersed in 10 mL DMF, which was kept in an oil bath at 160 °C for 16 h. The obtained product was corrected by centrifugation and wash with ethanol/water solution for several cycles.

**Characterizations:** The size and morphology of the obtained samples were measured by scanning electron microscopy (SEM, ZEISS SUPRA 55). The transmission electron microscopy (TEM), high-resolution TEM (HRTEM), high angle annular dark field scanning transmission electron microscopy (HAADF-STEM), and energy-dispersive X-ray (EDX) spectroscopy were also conducted by JEM-2010 operated at 200 kV. The X-ray diffraction (XRD) patterns were obtained by using a PANalytical X'Pert powder diffractometer with a Cu K $\alpha$  radiation X-ray source ( $\lambda$  = 0.154056 nm) at 40 kV and 40 mA. X-ray photoelectron spectroscopy (XPS) was investigated by using an ESCALAB MK II spectrometer (VG Scientific, UK) by using Al K $\alpha$  X-rays as the light source.

**Electrochemical measurements:** A conventional three-electrode cell was used to estimate the electrochemical performance of samples by an electrochemical work-station CHI 660E under

ambient conditions, which used Hg/HgO electrode as a reference electrode and graphite rod as the counter electrode. For the preparation of working electrode, PtPdH MNCs powder (2 mg) was dispersed into 1 mL of a mixed solution (700 mL water and 300 mL isopropanol) under ultrasonic treatment for 30 min, then 2.5  $\mu\text{L}$  of as-prepared catalyst ink was coated onto the surface of the polished glassy carbon electrode (GCE, 0.071  $\text{cm}^2$ ), followed by adding 3 mL of Nafion (0.05 wt%). For comparison, the Pt mass loading of commercial Pt/C in electrode was similar to that of PtPdH MNCs (70.42  $\mu\text{g cm}^{-2}$ ). Linear sweep voltammetry (LSV) was performed in 1.0 M KOH solution at 5  $\text{mV s}^{-1}$  at room temperature. The FE was calculated by comparing the amount of measured hydrogen generated by potentiostatic cathode electrolysis ( $-0.05$  V) with calculated hydrogen (assuming 100% FE). The overpotentials are converted to reversible hydrogen electrodes (RHE) and corrected by ohmic drop using the equation:  $E_{(iR\text{-corrected})} = E - iR$ , where  $i$  is the current and  $R$  is the electrolyte ohmic resistance measured by electrochemical impedance spectroscopy. All the electrochemical data were exhibited with  $iR$  compensation.

**Calculation of hydrogen content:** The amount of H atoms in the PtPd-H is in proportion to the fraction of guest atoms ( $X = \text{H}/(\text{Pt}+\text{Pd})$ ), as expressed by the equation:  $a = a_0 + 0.19X$  ( $\text{\AA}$ ), where the  $a_0$  is the lattice constant of the normal PtPd MNs (2.28  $\text{\AA}$ ). The constant of 0.19 is deduced from the lattice parameter of Pd, PdH<sub>0.43</sub> and PdH<sub>0.706</sub> based on the Vegard's law.<sup>1</sup>

**Calculation of TOF:** The TOF is calculated from the following equation:<sup>2</sup>

$$\text{TOF} = j \times N_A / (n \times F \times \Gamma)$$

where  $j$  is the current density,  $N_A$  is the Avogadro number,  $n$  is the number of electron transferred for the evolution of a single H<sub>2</sub> molecule,  $F$  is the Faraday constant, and  $\Gamma$  is the surface concentration.

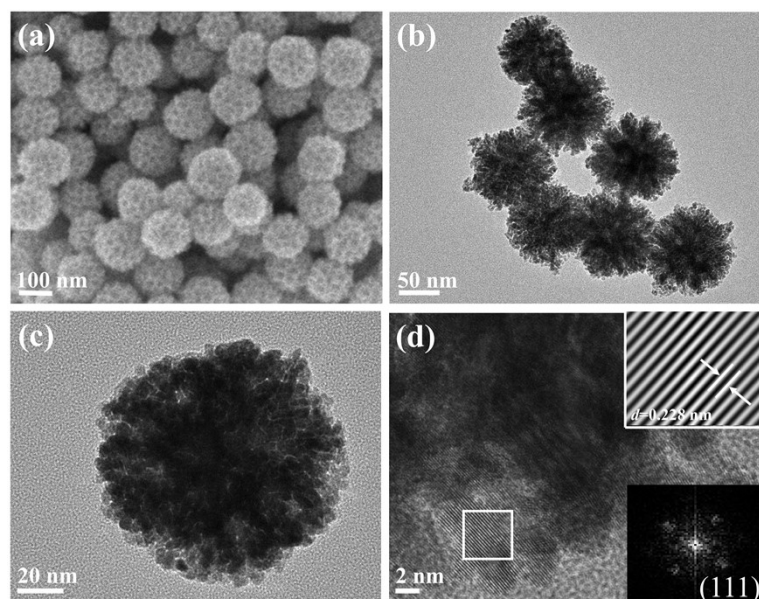

**Fig. S1** (a) SEM, (b and c) TEM and (d) HRTEM images of PtPd MNCs. The inset in (d) represents the corresponding Fourier-filtered lattice fringes of the selected area.

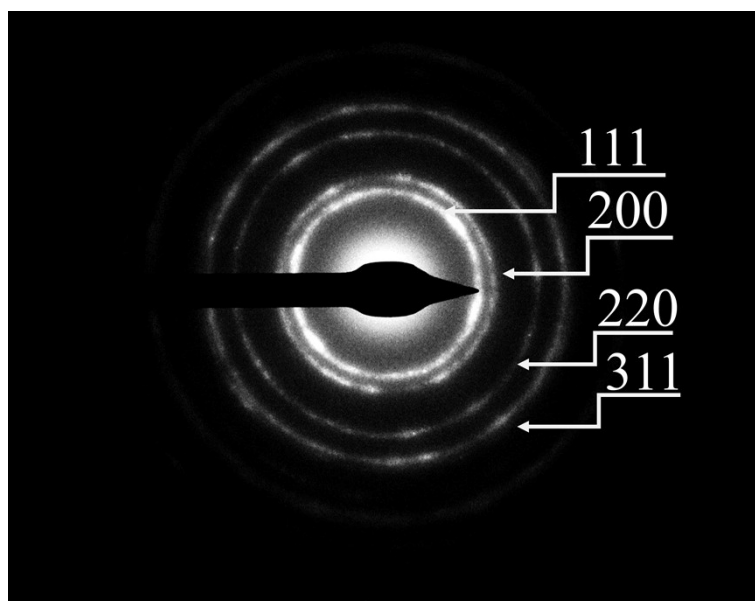

**Fig. S2** SAED pattern of PtPdH MNCs.

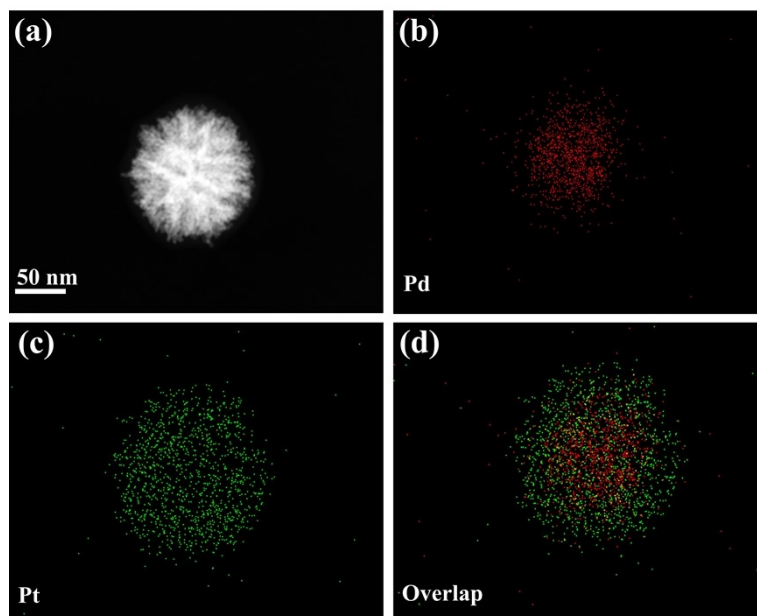

**Fig. S3** (a) HAADF-STEM image of a PtPdH MNCs and (b-d) corresponding EDX element mapping images of PtPdH MNCs.

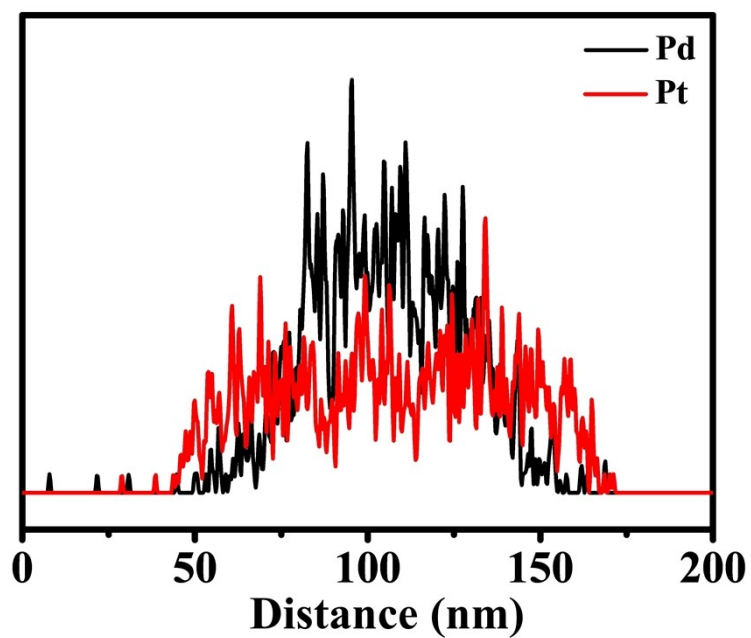

**Fig. S4** Elemental distribution line profiles of PtPdH MNCs.

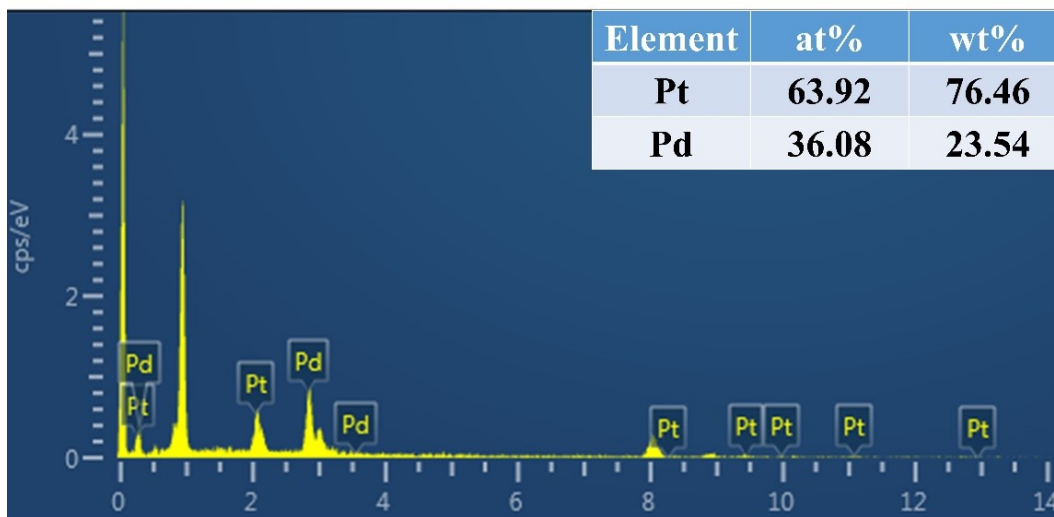

**Fig. S5** EDX spectrum of PtPdH MNCs and corresponding mass and atomic ratios of Pt/Pd.

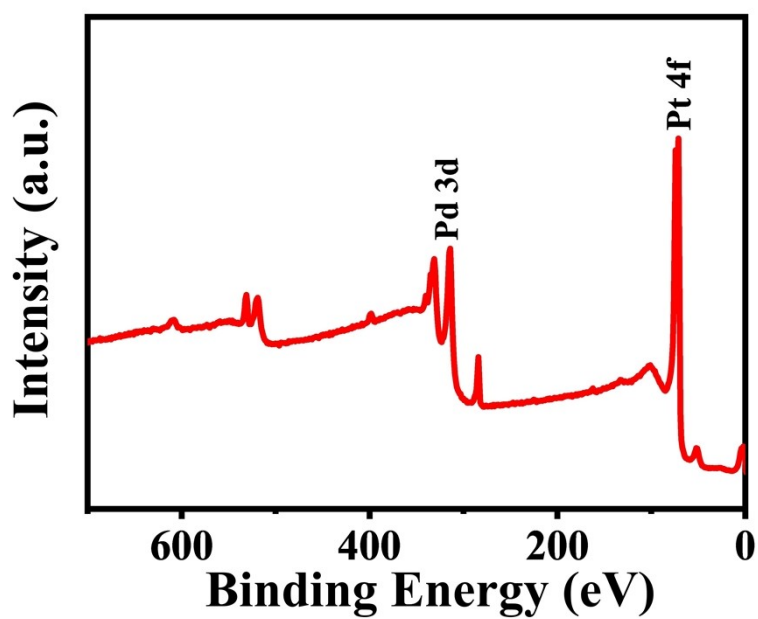

**Fig. S6** The XPS survey spectrum of the PtPdH MNCs.

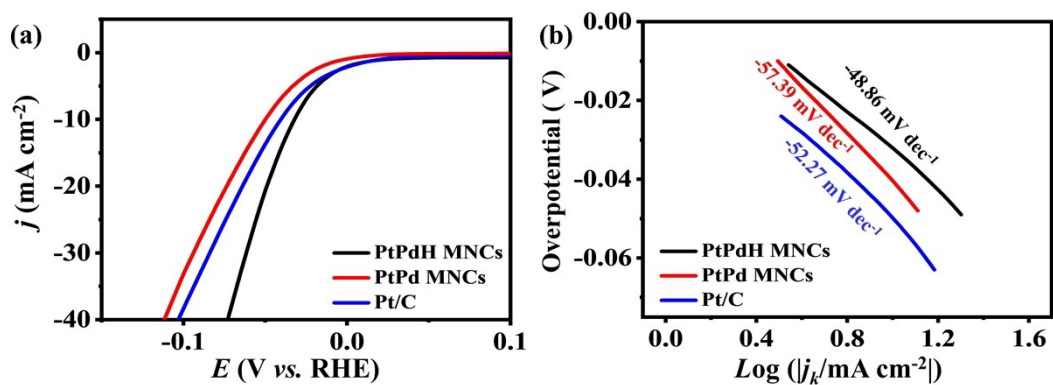

**Fig. S7** (a) LSV curves for various catalysts in 0.5 M  $\text{H}_2\text{SO}_4$  electrolyte and (b) corresponding Tafel plots.

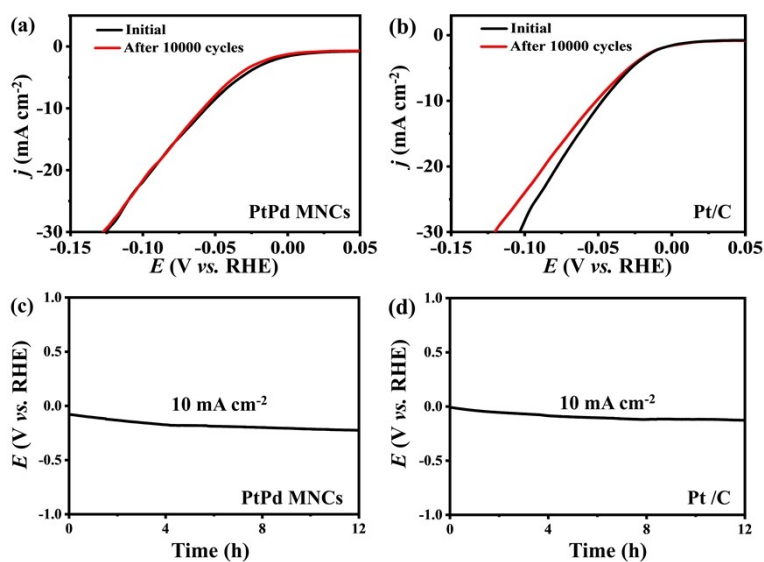

**Fig. S7** LSV curves of the PtPd MNCs (a) and Pt/C (b), and  $V-t$  curves of the PtPd MNCs (c) and Pt/C (d).

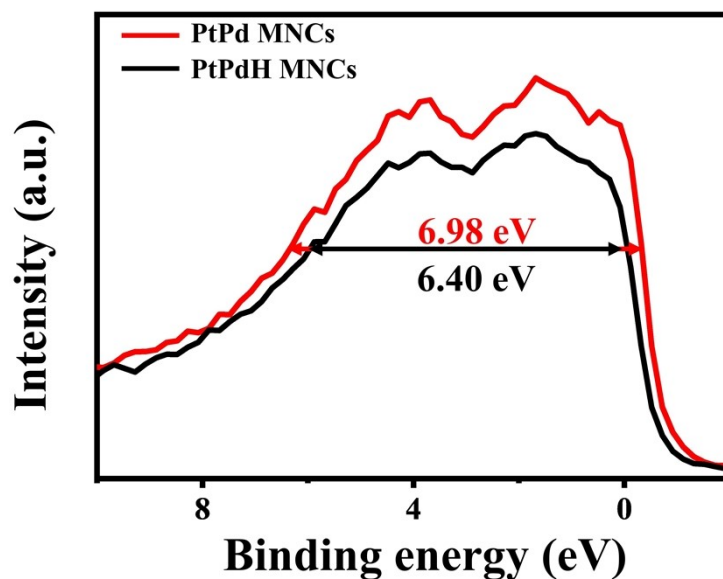

**Fig. S9** XPS valence band spectra of PtPdH MNPs and PtPd MNCs.

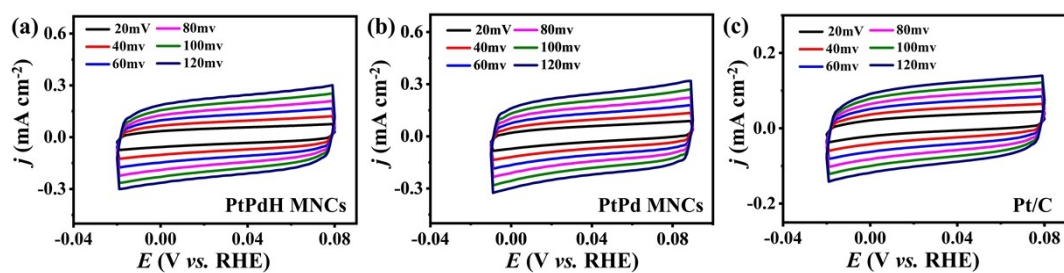

**Fig. S10** CV curves for (a) PtPdH MNCs, (b) PtPd MNCs and (c) Pt/C at different scan rates.



**Table 1** Summary of HER performance of PtPdH MNCs and reported high-performance noble metal based catalysts in recent literatures under 1 M KOH.

| <b>Catalyst</b>                        | <b>Electrolyte</b> | <b>Overpotential at<br/>-10 mA cm<sup>-2</sup> (mV)</b> | <b>Ref.</b>      |
|----------------------------------------|--------------------|---------------------------------------------------------|------------------|
| <b>PtPdH MNCs</b>                      | <b>0.1 M KOH</b>   | <b>-32</b>                                              | <b>This work</b> |
| <b>Pt-Ni alloy</b>                     | 0.1 M KOH          | -65                                                     | 3                |
| <b>Pt/h-BN</b>                         | 0.1 M KOH          | -75                                                     | 4                |
| <b>PtNi-O<br/>nanostructure</b>        | 0.1 M KOH          | -40                                                     | 5                |
| <b>PtNiP MNs/C</b>                     | 0.1 M KOH          | -54                                                     | 6                |
| <b>Pt-Ni nanowires</b>                 | 0.1 M KOH          | -40                                                     | 7                |
| <b>RhPdH Nanosheets</b>                | 0.1 M KOH          | -40                                                     | 8                |
| <b>N-Pd/A-Co(II)</b>                   | 0.1 M KOH          | -58                                                     | 9                |
| <b>PdS nanosheets</b>                  | 0.1 M KOH          | -49                                                     | 10               |
| <b>Pd<sub>0.1</sub>TaS<sub>2</sub></b> | 0.1 M KOH          | -77                                                     | 11               |

## References

1. J. Fan, J. Wu, X. Cui, L. Gu, Q. Zhang, F. Meng, B. H. Lei, D. J. Singh and W. Zheng, *J. Am. Chem. Soc.*, 2020, **142**, 3645-3651.
2. S. Anantharaj and S. Kundu, *ACS Energy Lett.*, 2019, **4**, 1260-1264.
3. Z. Cao, Q. Chen, J. Zhang, H. Li, Y. Jiang, S. Shen, G. Fu, B.-a. Lu, Z. Xie and L. Zheng, *Nat. Commun.*, 2017, **8**, 15131.
4. A. Guha, T. Veetil Vineesh, A. Sekar, S. Narayanaru, M. Sahoo, S. Nayak, S. Chakraborty and T. N. Narayanan, *ACS Catal.*, 2018, **8**, 6636-6644.
5. Z. Zhao, H. Liu, W. Gao, W. Xue, Z. Liu, J. Huang, X. Pan and Y. Huang, *J. Am. Chem. Soc.*, 2018, **140**, 9046-9050.
6. L. Ai, J. Su, M. Wang and J. Jiang, *ACS Sustainable Chem. Eng.*, 2018, **6**, 9912-9920.
7. P. Wang, K. Jiang, G. Wang, J. Yao and X. Huang, *Angew. Chem., Int. Ed.*, 2016, **55**, 12859-12863.
8. J. Fan, J. Wu, X. Cui, L. Gu, Q. Zhang, F. Meng, B. H. Lei, D. J. Singh and W. Zheng, *J. Am. Chem. Soc.*, 2020, **142**, 3645-3651.
9. L. Li, Y. Ji, X. Luo, S. Geng, M. Fang, Y. Pi, Y. Li, X. Huang and Q. Shao, *Small*, 2021, **17**, 2103798
10. Y. Wang, K. Xu, Z. Zhu, W. Guo, T. Yu, M. He, W. Wei and T. Yang, *Chem. Commun.*, 2021, **57**, 1368-1371.
11. D. Wang, X. Wang, Y. Lu, C. Song, J. Pan, C. Li, M. Sui, W. Zhao and F. Huang, *J. Mater. Chem. A*, 2017, **5**, 22618-22624.
